# Supplementary material for: Expression of uterine lipocalin 2 and its receptor during early- to mid-pregnancy period in mares
Source: PubMed Central journal article supplement — J Reprod Dev. 2016 Dec 16;63(2):127–33. doi: 10.1262/jrd.2016-096 (PMC5401805; doi:10.1262/jrd.2016-096), 2016-12-16

**Supplementary Fig. 1.**

Equine uterus and designation of its parts. The uterine horns are designated as non-gravid (N1–N3) or gravid (G1–G3) relative to the absence or presence of a conceptus, whereas portions of the uterine body are designated as B1–B3 relative to uterine horns.

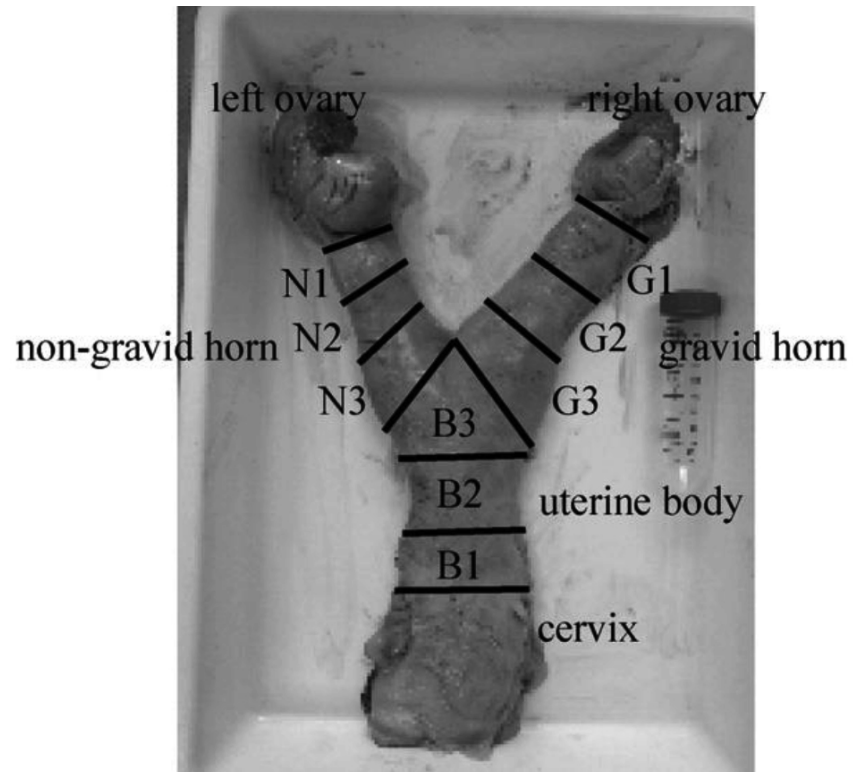

Supplement: jrd-63-127-s001.pdf [file jrd-63-127-s001.pdf]
